# Supplementary material for: Tumor spheroids accelerate persistently invading cancer cells
Source: PubMed Central journal article supplement (PMC9424244; doi:10.1038/s41598-022-18950-x), 2022-08-29
Supplement: 41598_2022_18950_MOESM1_ESM.pdf [file 41598_2022_18950_MOESM1_ESM.pdf]

## Supplementary

# Tumor spheroids accelerate persistently invading cancer cells

Melanie Audoin<sup>1,\*</sup>, Maria Tangen Sogaard<sup>1,2,\*</sup>, and Liselotte Jauffred<sup>1,\*</sup>

<sup>1</sup>The Niels Bohr Institute, University of Copenhagen, Blegdamsvej 17, DK-2100 Copenhagen O, Denmark

<sup>2</sup>Present address: DTU Health Tech, Denmark's Technical University, Ørsted Pl. 344, 108, 2800 Kgs. Lyngby, Denmark

\*jauffred@nbi.dk

†these authors contributed equally to this work

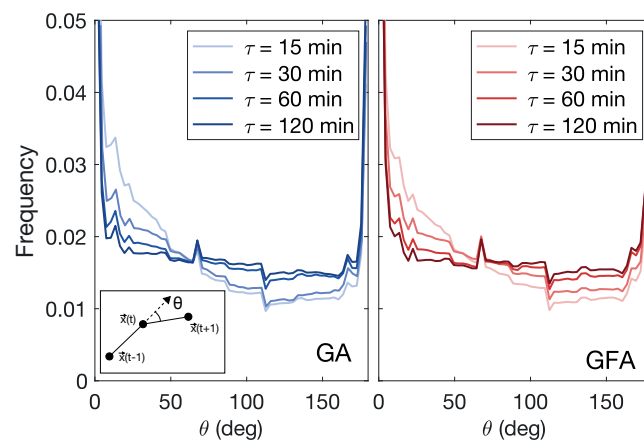

**Fig. S1** Normalized and smoothed distribution of turning angles,  $\theta$ , for GA ( $N=177$ ) and GFA ( $N=305$ ). The insert is a sketch of  $\theta$  as defined in the main article. In both the GA and GFA cases, the distribution has local maximum at  $\theta = 0$  and  $\theta = 180^\circ$  and flattens for larger delays,  $\tau$ .

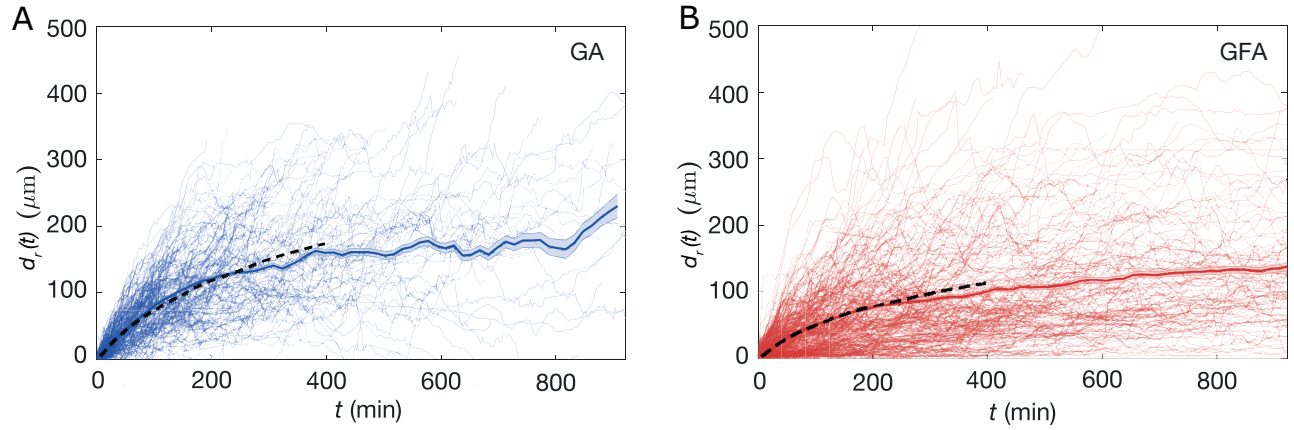

**Fig. S2** Time evolution of the average migration displacement,  $d(t)$ , versus time. **(A)** The thin lines represents individual trajectories ( $N=177$ ) and the full line is the average distance and shaded area is one SEM. The dotted black line corresponds to the average simulated trajectories using the BPRW model. **(B)** The thin lines represents all tracked trajectories ( $N=305$ ) and the full line is the average distance and shaded area is one SEM. The dotted black line corresponds to the average simulated trajectories using the PRW model.

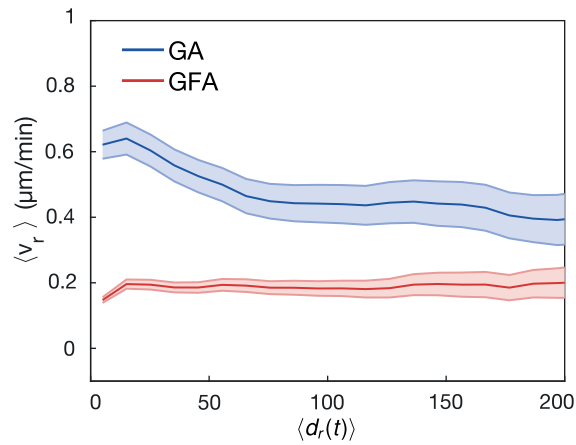

**Fig. S3** Evolution of the ensemble-averaged radial velocity,  $\langle v_r \rangle$ , (mean  $\pm$  SEM) against radial distance,  $d_r(t)$  for both GA (blue) and GFA (red).  $v_r$  is binned on 15  $\mu\text{m}$  with a moving average of 10 points.
